# Supplementary material for: DNA Hypomethylation as a Potential Link between Excessive Alcohol Intake and Cardiometabolic Dysfunction in Morbidly Obese Adults
Source: MDPI journal article supplement (doi:10.3390/biomedicines10081954), 2022-08-12
Supplement: s1 [file s1]

**Supplementary Table S1.** Sequences of primers used for real-time PCR

| Gene name | RefSeq Accession Number |    | Primer sequence       | Tm    | Amplicon size |
|-----------|-------------------------|----|-----------------------|-------|---------------|
| CXCL1     | NM_001511.4             | Fw | ACTCTACCTGCACACTGTCC  | 59.03 | 219           |
|           |                         | Rv | TCCCCTGCCTTCACAATGAT  | 59.00 |               |
| CXCR2     | NM_001168298.2          | Fw | TGGTGGTGAGTGCCTGTAAT  | 58.94 | 231           |
|           |                         | Rv | GCTGCCATACTGTCTTCTGC  | 58.99 |               |
| HDAC5     | NM_001382393.1          | Fw | CCGGGTTTGATGCTGTTGAA  | 59.04 | 159           |
|           |                         | Rv | CATCACAGATGGCGGTCAAG  | 58.99 |               |
| IGFBP3    | NM_000598.5             | Fw | GGGTAGGAGGGACAGAGAGA  | 59.07 | 247           |
|           |                         | Rv | CAGCAAGCCATTCTCTCCTTC | 58.90 |               |
| IL12RB2   | NM_001258214.1          | Fw | CATAAACGCACCTCACCTCG  | 59.00 | 229           |
|           |                         | Rv | ACTCGCTTCTCAGTTCAGCT  | 59.03 |               |
| IL1R1     | NM_000877.4             | Fw | GGGACTTTACACAGGGACCA  | 58.94 | 213           |
|           |                         | Rv | GCAACGCCATAAGACAGGAG  | 58.99 |               |
| IL7       | NM_000880.4             | Fw | GGTGATTGCGAAATTCGCGA  | 59.00 | 158           |
|           |                         | Rv | CGCCAGCAGTGTACTTTCAG  | 59.21 |               |
| IL12A     | NM_000882.4             | Fw | TCAGAATTCGGGCAGTGA    | 59.02 | 163           |
|           |                         | Rv | AGTCCCATCTTCTTTCCCC   | 58.70 |               |
| IL17RA    | NM_001289905.2          | Fw | TGTTCCCATCTGCTCCCATT  | 59.00 | 183           |
|           |                         | Rv | TTGTGCAGGGTCAATTGTGG  | 58.96 |               |
| MYD88     | NM_001172566.2          | Fw | CAGGAACAGCTAGGTGGGAA  | 59.02 | 240           |
|           |                         | Rv | GGGAAGGAGAGAGGGAGAGA  | 59.07 |               |
| NFATC3    | NM_004555.4             | Fw | GATCCAGCGTCATTTCCACC  | 58.98 | 192           |
|           |                         | Rv | TGGACATGAGAGCACACTGT  | 58.95 |               |
| NFκB      | NM_001165412.2          | Fw | AATGGTGGAGTCTGGGAAGG  | 59.00 | 226           |
|           |                         | Rv | TCTGACGTTTCTCTGCACT   | 58.96 |               |
| NFKBIB    | NM_001243116.2          | Fw | ATACCCCTGTCGCCTTGAC   | 59.17 | 188           |
|           |                         | Rv | CGGTTTGTCAAGGTCAGCTC  | 59.13 |               |
| SMAD3     | NM_001145102.2          | Fw | CTCTGGGTGCTTGGA       | 59.02 | 165           |
|           |                         | Rv | ATCCAAATGCAGCCAAACGT  | 59.03 |               |
| TGFB2     | NM_001024847.3          | Fw | AAGGAAGGGACCCATGACAG  | 59.00 | 179           |
|           |                         | Rv | ATGGCCAGAAGAGAAGTGCT  | 59.01 |               |
| TLR5      | NM_003268.6             | Fw | CTGACTCGTTCTCTGGGGTT  | 59.03 | 156           |
|           |                         | Rv | CCCGGAACTTTGTGACTGTG  | 59.06 |               |
| TNFRSF8   | NM_001243.5             | Fw | CTGTTTACTCATCGGGCAGC  | 58.99 | 197           |
|           |                         | Rv | AGACACCCACTCCATCCTTG  | 59.01 |               |
| TRAF6     | NM_004620.4             | Fw | TCTTGTGACAACTGTGCTGC  | 58.98 | 165           |
|           |                         | Rv | GCATGGAATTGGGGCTGTAG  | 58.96 |               |

**Supplementary Table S2.** Percentage of DNA methylation of inflammatory genes in VAT

| Gene    | % Methylated $\pm$ SD |                   |                   | P-value |
|---------|-----------------------|-------------------|-------------------|---------|
|         | No/Mild               | Moderate          | Heavy             |         |
| ABCF1   | 36.0% $\pm$ 45.4%     | 30.1% $\pm$ 13.1% | 41.3% $\pm$ 22.4% | NS      |
| ADA     | 51.7% $\pm$ 50.4%     | 26.7% $\pm$ 40.8% | 21.6% $\pm$ 37.5% | NS      |
| ATF2    | 54.9% $\pm$ 48.0%     | 41.7% $\pm$ 49.2% | 33.3% $\pm$ 57.7% | NS      |
| BCL10   | 40.0% $\pm$ 50.7%     | 16.8% $\pm$ 40.7% | 27.4% $\pm$ 37.3% | NS      |
| BCL3    | 30.1% $\pm$ 44.9%     | 27.2% $\pm$ 13.2% | 32.2% $\pm$ 11.1% | NS      |
| BCL6    | 33.0% $\pm$ 43.2%     | 42.1% $\pm$ 47.8% | 17.3% $\pm$ 29.6% | NS      |
| BLM     | 53.2% $\pm$ 51.5%     | 16.7% $\pm$ 40.8% | 47.1% $\pm$ 14.1% | NS      |
| CCL25   | 51.0% $\pm$ 45.6%     | 42.0% $\pm$ 48.8% | 19.7% $\pm$ 33.5% | NS      |
| CD274   | 52.3% $\pm$ 46.7%     | 61.5% $\pm$ 37.6% | 33.3% $\pm$ 28.9% | NS      |
| CD276   | 47.4% $\pm$ 46.9%     | 29.9% $\pm$ 20.0% | 16.7% $\pm$ 28.9% | NS      |
| CD40    | 52.0% $\pm$ 45.7%     | 58.0% $\pm$ 46.6% | 16.7% $\pm$ 28.9% | NS      |
| CD47    | 20.7% $\pm$ 41.1%     | 9.4% $\pm$ 20.0%  | 47.7% $\pm$ 46.6% | NS      |
| CD7     | 72.2% $\pm$ 43.9%     | 47.2% $\pm$ 37.8% | 76.8% $\pm$ 16.5% | NS      |
| CD8A    | 52.3% $\pm$ 45.9%     | 14.8% $\pm$ 36.1% | 47.1% $\pm$ 44.2% | NS      |
| CEBPB   | 38.3% $\pm$ 44.9%     | 25.0% $\pm$ 41.8% | 16.7% $\pm$ 28.9% | NS      |
| CSF1    | 53.3% $\pm$ 46.7%     | 16.7% $\pm$ 40.8% | 26.7% $\pm$ 18.9% | NS      |
| CXCL1   | 57.5% $\pm$ 40.8%     | 9.2% $\pm$ 20.0%  | 9.8% $\pm$ 14.8%  | <0.0005 |
| CXCL12  | 46.7% $\pm$ 51.4%     | 21.1% $\pm$ 33.1% | 27.0% $\pm$ 46.7% | NS      |
| CXCL14  | 37.3% $\pm$ 39.2%     | 23.8% $\pm$ 38.9% | 28.1% $\pm$ 46.6% | NS      |
| CXCL2   | 47.8% $\pm$ 40.2%     | 17.3% $\pm$ 40.5% | 35.2% $\pm$ 30.1% | NS      |
| CXCL3   | 53.8% $\pm$ 48.9%     | 28.6% $\pm$ 45.2% | 19.0% $\pm$ 32.8% | NS      |
| CXCL5   | 37.9% $\pm$ 44.2%     | 28.1% $\pm$ 18.6% | 13.0% $\pm$ 3.2%  | NS      |
| CXCL6   | 49.4% $\pm$ 46.5%     | 33.1% $\pm$ 21.3% | 30.5% $\pm$ 20.4% | NS      |
| CXCR4   | 55.4% $\pm$ 25.5%     | 45.3% $\pm$ 11.6% | 29.5% $\pm$ 11.1% | <0.0005 |
| DPP4    | 32.8% $\pm$ 44.4%     | 30.1% $\pm$ 46.8% | 27.6% $\pm$ 35.4% | NS      |
| EGR1    | 42.2% $\pm$ 44.3%     | 16.9% $\pm$ 36.9% | 20.4% $\pm$ 21.2% | NS      |
| FADD    | 37.8% $\pm$ 48.0%     | 11.1% $\pm$ 20.2% | 30.4% $\pm$ 52.3% | NS      |
| FOS     | 23.8% $\pm$ 40.3%     | 29.8% $\pm$ 45.9% | 31.0% $\pm$ 21.0% | NS      |
| FOXP3   | 67.0% $\pm$ 47.8%     | 47.3% $\pm$ 52.1% | 46.7% $\pm$ 44.2% | NS      |
| FOXP3   | 70.3% $\pm$ 28.0%     | 76.1% $\pm$ 38.6% | 92.7% $\pm$ 4.4%  | NS      |
| GATA3   | 29.0% $\pm$ 37.9%     | 32.5% $\pm$ 50.1% | 33.2% $\pm$ 57.2% | NS      |
| HDAC4   | 85.9% $\pm$ 17.6%     | 68.8% $\pm$ 14.9% | 15.5% $\pm$ 3.8%  | <0.0005 |
| HMOX1   | 46.2% $\pm$ 51.1%     | 39.8% $\pm$ 46.6% | 30.0% $\pm$ 10.0% | NS      |
| ICOSLG  | 36.9% $\pm$ 47.8%     | 33.5% $\pm$ 50.2% | 33.3% $\pm$ 57.7% | NS      |
| IGFBP3  | 93.9% $\pm$ 34.1%     | 89.1% $\pm$ 22.8% | 48.9% $\pm$ 13.8% | <0.0005 |
| IL10RA  | 35.1% $\pm$ 41.9%     | 38.1% $\pm$ 43.6% | 19.9% $\pm$ 31.0% | NS      |
| IL10RB  | 27.3% $\pm$ 39.8%     | 24.1% $\pm$ 38.6% | 20.2% $\pm$ 10.2% | NS      |
| IL12A   | 41.9% $\pm$ 44.7%     | 14.5% $\pm$ 8.9%  | 10.5% $\pm$ 12.1% | <0.0005 |
| IL12RB2 | 84.4% $\pm$ 15.7%     | 22.3% $\pm$ 9.5%  | 17.2% $\pm$ 11.5% | <0.0005 |
| IL13    | 37.3% $\pm$ 38.1%     | 58.4% $\pm$ 46.5% | 33.3% $\pm$ 57.7% | NS      |
| IL13RA1 | 50.0% $\pm$ 29.2%     | 37.6% $\pm$ 34.0% | 33.2% $\pm$ 14.7% | NS      |
| IL15    | 69.9% $\pm$ 40.1%     | 44.1% $\pm$ 49.6% | 33.0% $\pm$ 57.1% | NS      |
| IL15RA  | 39.2% $\pm$ 45.5%     | 22.2% $\pm$ 36.0% | 30.2% $\pm$ 10.2% | NS      |
| IL17C   | 42.3% $\pm$ 41.0%     | 25.6% $\pm$ 38.4% | 40.4% $\pm$ 15.5% | NS      |

|          |               |               |               |         |
|----------|---------------|---------------|---------------|---------|
| IL17RA   | 37.3% ± 35.9% | 12.8% ± 3.5%  | 9.2% ± 6.3%   | <0.0005 |
| IL1R1    | 88.3% ± 18.9% | 52.3% ± 19.1% | 33.4% ± 17.4% | <0.0005 |
| IL36B    | 80.8% ± 35.6% | 81.9% ± 48.9% | 99.7% ± 35.3% | NS      |
| IL4R     | 31.6% ± 32.9% | 26.2% ± 42.1% | 50.0% ± 49.5% | NS      |
| IL6R     | 39.4% ± 44.2% | 30.2% ± 36.8% | 32.3% ± 36.9% | NS      |
| IL6ST    | 45.5% ± 41.2% | 22.5% ± 34.9% | 17.4% ± 30.0% | NS      |
| IL7      | 93.0% ± 19.5% | 86.3% ± 18.7% | 22.8% ± 8.1%  | <0.0005 |
| INHA     | 27.3% ± 39.0% | 36.7% ± 49.2% | 20.5% ± 35.2% | NS      |
| INHBA    | 37.2% ± 41.4% | 54.6% ± 45.0% | 22.0% ± 37.1% | NS      |
| IRF1     | 28.9% ± 38.1% | 19.4% ± 39.9% | 20.9% ± 36.0% | NS      |
| JUN      | 53.5% ± 46.2% | 16.7% ± 40.8% | 38.0% ± 32.9% | NS      |
| LAG3     | 24.5% ± 31.5% | 19.2% ± 39.1% | 35.8% ± 55.7% | NS      |
| LCK      | 36.2% ± 41.0% | 39.5% ± 46.1% | 21.7% ± 34.6% | NS      |
| LTB      | 41.4% ± 35.2% | 18.9% ± 29.2% | 2.3% ± 4.0%   | NS      |
| LTB4R    | 32.3% ± 32.6% | 41.9% ± 44.7% | 50.0% ± 49.7% | NS      |
| MALT1    | 41.4% ± 39.4% | 30.4% ± 31.1% | 27.0% ± 43.5% | NS      |
| MAP3K7   | 57.3% ± 38.9% | 20.6% ± 33.6% | 48.3% ± 42.9% | NS      |
| MAPK14   | 53.3% ± 42.5% | 39.5% ± 36.1% | 31.6% ± 27.5% | NS      |
| MICB     | 54.1% ± 40.0% | 45.4% ± 49.8% | 68.4% ± 27.0% | NS      |
| MIF      | 45.1% ± 36.0% | 17.5% ± 29.5% | 30.2% ± 17.1% | NS      |
| MYD88    | 69.5% ± 33.4% | 25.4% ± 11.6% | 25.5% ± 5.5%  | <0.0005 |
| NCK1     | 59.0% ± 44.7% | 68.7% ± 37.9% | 54.3% ± 47.4% | NS      |
| NFATC3   | 47.4% ± 13.8% | 44.7% ± 16.5% | 32.1% ± 10.7% | <0.0005 |
| NFKB1    | 94.5% ± 14.1% | 53.7% ± 27.2% | 55.9% ± 19.5% | <0.0005 |
| NFKBIB   | 54.8% ± 41.9% | 20.0% ± 12.4% | 12.7% ± 21.4% | <0.0005 |
| NOD1     | 47.8% ± 42.4% | 49.6% ± 41.5% | 77.2% ± 24.2% | NS      |
| NR3C1    | 36.3% ± 41.6% | 52.4% ± 41.6% | 15.6% ± 17.8% | NS      |
| PAX1     | 65.0% ± 45.4% | 51.2% ± 44.8% | 39.9% ± 40.2% | NS      |
| PF4      | 50.0% ± 31.8% | 50.6% ± 44.6% | 66.8% ± 29.0% | NS      |
| PTGS2    | 35.4% ± 40.5% | 42.9% ± 36.8% | 40.0% ± 30.0% | NS      |
| RELA     | 25.1% ± 30.9% | 28.3% ± 40.0% | 20.1% ± 16.2% | NS      |
| RIPK2    | 52.5% ± 40.5% | 15.1% ± 36.8% | 26.1% ± 42.6% | NS      |
| RUNX1    | 47.6% ± 42.7% | 27.7% ± 44.0% | 42.1% ± 36.4% | NS      |
| S1PR3    | 49.0% ± 44.6% | 33.1% ± 51.3% | 33.3% ± 57.7% | NS      |
| SMAD3    | 95.2% ± 15.2% | 69.1% ± 11.5% | 57.5% ± 19.1% | <0.0005 |
| SOCs1    | 44.5% ± 38.7% | 31.7% ± 49.0% | 50.0% ± 40.0% | NS      |
| SOD1     | 50.6% ± 42.3% | 46.2% ± 50.8% | 33.3% ± 57.6% | NS      |
| STAT1    | 59.5% ± 39.3% | 21.6% ± 39.0% | 38.4% ± 33.3% | NS      |
| STAT5A   | 52.4% ± 45.5% | 38.7% ± 42.5% | 68.4% ± 9.8%  | NS      |
| TGFBR2   | 94.9% ± 24.4% | 26.8% ± 19.6% | 16.7% ± 11.5% | <0.0005 |
| NELFCD   | 58.5% ± 44.5% | 33.4% ± 51.6% | 20.7% ± 34.2% | NS      |
| THY1     | 63.3% ± 48.0% | 41.7% ± 49.2% | 66.7% ± 57.7% | NS      |
| TIRAP    | 44.2% ± 43.6% | 25.2% ± 41.2% | 20.5% ± 35.4% | NS      |
| TLR2     | 59.8% ± 45.6% | 33.8% ± 51.2% | 36.4% ± 35.3% | NS      |
| TLR5     | 35.7% ± 16.6% | 17.9% ± 7.6%  | 5.6% ± 4.1%   | <0.0005 |
| TNFRSF1B | 31.1% ± 9.3%  | 25.1% ± 7.5%  | 22.6% ± 5.3%  | <0.0005 |
| TOLLIP   | 50.8% ± 49.8% | 33.3% ± 51.6% | 35.2% ± 54.6% | NS      |
| TRAF2    | 50.6% ± 49.2% | 27.4% ± 43.9% | 17.3% ± 28.3% | NS      |

|       |               |               |               |         |
|-------|---------------|---------------|---------------|---------|
| TRAF6 | 80.0% ± 25.2% | 81.6% ± 17.5% | 50.5% ± 22.3% | <0.0005 |
| TYK2  | 70.0% ± 45.5% | 83.2% ± 40.8% | 91.0% ± 20.0% | NS      |

---

NS, not significant
